# Supplementary material
Source: publisher figshare collection journal article supplement (https://acs.figshare.com/ndownloader/files/3902659)
Supplement: Supplementary file 1 [file 3902659]

## Supplementary Information to

### Investigating the Influence of Phosphate Ions on Poly-L-lysine Conformations by Taylor Dispersion Analysis

Xiaoyun Jin, Laurent Leclercq, Nicolas Sisavath, Hervé Cottet\*

The coefficients  $C_i$  used in Equation (5) are given below according to ref. 53 :

$$C_1 = 3.230981 - 143.7458 \times (d/2q) - 1906.263 \times (d/2q)^2 + [2.463404 - 1422.067 \times (d/2q)^2] \times \ln (d/2q)$$

$$C_2 = -22.46149 + 1347.079 \times (d/2q) + 19387.4 \times (d/2q)^2 + [-5.318869 + 13868.57 \times (d/2q)^2] \times \ln (d/2q)$$

$$C_3 = 54.8169 - 3235.401 \times (d/2q) - 49357.06 \times (d/2q)^2 + [15.41744 - 34447.63 \times (d/2q)^2] \times \ln (d/2q)$$

$$C_4 = -32.91952 + 2306.793 \times (d/2q) + 36732.64 \times (d/2q)^2 + [-8.516339 + 25198.11 \times (d/2q)^2] \times \ln (d/2q)$$

for  $d/2q < 0.1$ , where  $d$  is the diameter of the wormlike cylinder of theoretical contour length  $L$ .
